# Supplementary material for: Lineage-Specific Responses of Tooth Shape in Murine Rodents (Murinae, Rodentia) to Late Miocene Dietary Change in the Siwaliks of Pakistan
Source: PubMed Central journal article supplement (PMC3796524; doi:10.1371/journal.pone.0076070), 2013-10-14
Supplement: pone.0076070.s001.pdf [file pone.0076070.s001.pdf]

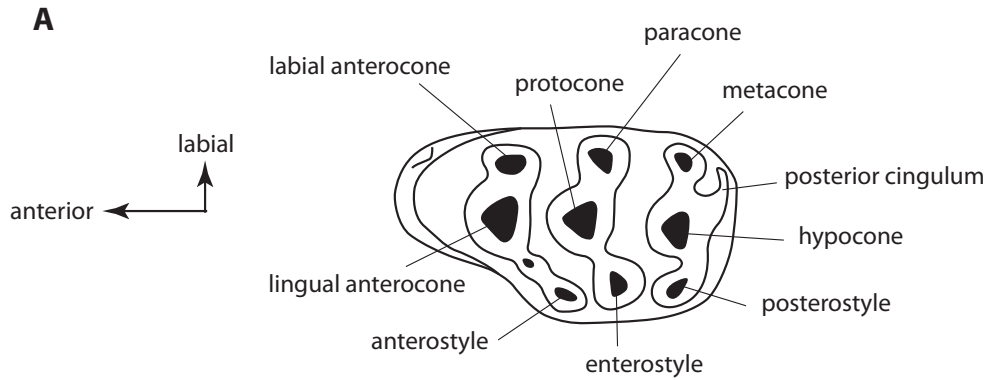

**upper first molar (M1)**

modified from Jacobs (1978)

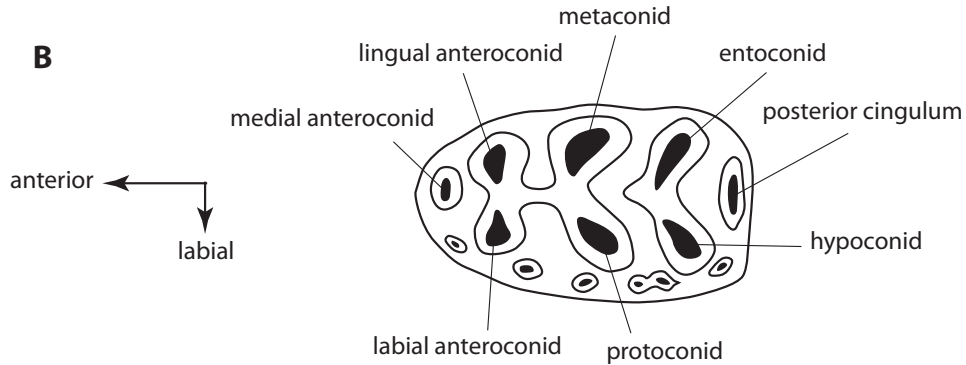

**lower first molar (m1)**

modified from Jacobs (1978)

**Figure S1.** Tooth terminology used in this study. (A) Upper first molar. (B) Lower first molar.
