# Supplementary material for: Lineage-Specific Responses of Tooth Shape in Murine Rodents (Murinae, Rodentia) to Late Miocene Dietary Change in the Siwaliks of Pakistan
Source: PubMed Central journal article supplement (PMC3796524; doi:10.1371/journal.pone.0076070), 2013-10-14
Supplement: pone.0076070.s002.pdf [file pone.0076070.s002.pdf]

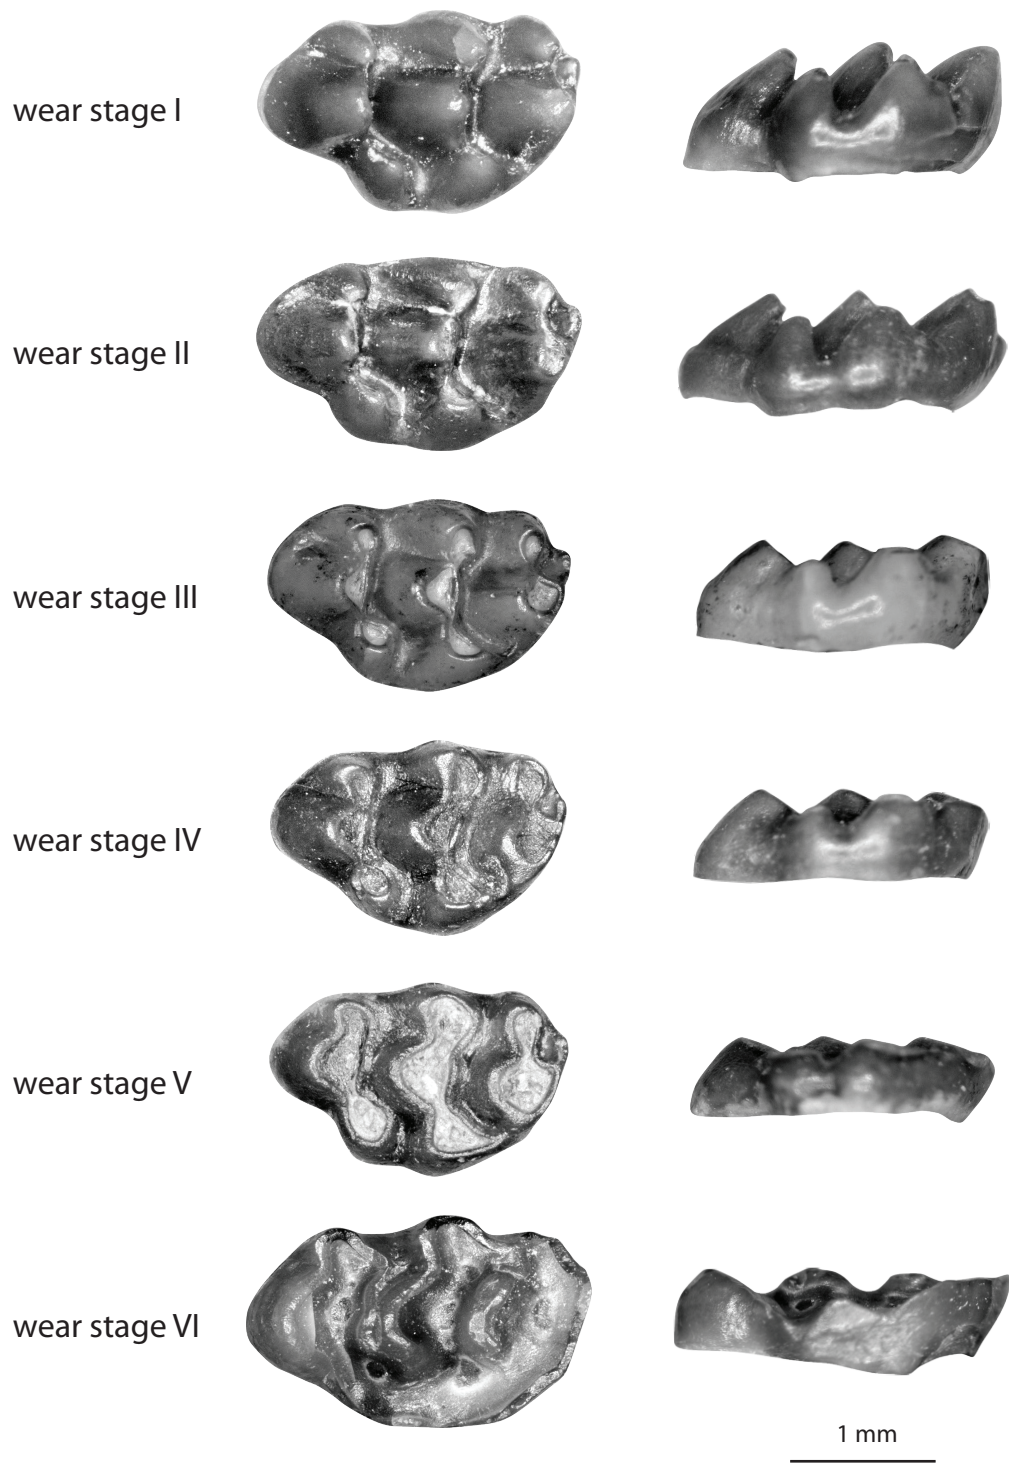

**Figure S2.** Examples of wear stages I to VI in *Karnimata darwini*. Wear stages I to IV correspond to those of Lazzari et al. (2008). From wear stage I to VI, specimens are YGSP 7692 (reversed), YGSP 7737, YGSP 7746 (reversed), YGSP 7667 (reversed), YGSP 7673, and YGSP 7725 (reversed), respectively.
