# Supplementary material for: Lineage-Specific Responses of Tooth Shape in Murine Rodents (Murinae, Rodentia) to Late Miocene Dietary Change in the Siwaliks of Pakistan
Source: PubMed Central journal article supplement (PMC3796524; doi:10.1371/journal.pone.0076070), 2013-10-14
Supplement: pone.0076070.s003.pdf [file pone.0076070.s003.pdf]

**Table S1.** A result of PCA on the covariance matrix of the shape data. The 95 % bootstrap confidence intervals were computed with 1000 randomizations in PAST.

| Principal component | Eigenvalue | Variance (%) | 95% bootstrap CI |             |
|---------------------|------------|--------------|------------------|-------------|
|                     |            |              | Lower limit      | Upper limit |
| 1                   | 0.000945   | 30.0         | 27.0             | 34.1        |
| 2                   | 0.000720   | 22.8         | 19.9             | 25.7        |
| 3                   | 0.000437   | 13.9         | 11.9             | 15.9        |
| 4                   | 0.000218   | 6.9          | 5.7              | 8.2         |
| 5                   | 0.000202   | 6.4          | 5.3              | 7.8         |
| 6                   | 0.000144   | 4.6          | 3.7              | 5.3         |
| 7                   | 0.000121   | 3.9          | 3.2              | 4.5         |
| 8                   | 0.000088   | 2.8          | 2.2              | 3.2         |
| 9                   | 0.000065   | 2.1          | 1.6              | 2.4         |
| 10                  | 0.000055   | 1.7          | 1.4              | 2.0         |
| 11                  | 0.000034   | 1.1          | 0.8              | 1.3         |
| 12                  | 0.000030   | 1.0          | 0.7              | 1.1         |
| 13                  | 0.000028   | 0.9          | 0.7              | 1.1         |
| 14                  | 0.000016   | 0.5          | 0.4              | 0.6         |
| 15                  | 0.000015   | 0.5          | 0.4              | 0.5         |
| 16                  | 0.000012   | 0.4          | 0.3              | 0.5         |
| 17                  | 0.000009   | 0.3          | 0.2              | 0.3         |
| 18                  | 0.000006   | 0.2          | 0.1              | 0.2         |
| 19                  | 0.000005   | 0.2          | 0.1              | 0.2         |
| 20                  | 3.60E-07   | 0.0          | 0.0              | 0.0         |
| 21                  | 2.47E-07   | 0.0          | 0.0              | 0.0         |
| 22                  | 1.72E-07   | 0.0          | 0.0              | 0.0         |
| 23                  | 9.15E-08   | 0.0          | 0.0              | 0.0         |
| 24                  | 7.28E-08   | 0.0          | 0.0              | 0.0         |
| 25                  | 4.56E-08   | 0.0          | 0.0              | 0.0         |
| 26                  | 2.77E-08   | 0.0          | 0.0              | 0.0         |
| 27                  | 2.22E-08   | 0.0          | 0.0              | 0.0         |
| 28                  | 1.51E-08   | 0.0          | 0.0              | 0.0         |
