# Supplementary material for: Lineage-Specific Responses of Tooth Shape in Murine Rodents (Murinae, Rodentia) to Late Miocene Dietary Change in the Siwaliks of Pakistan
Source: PubMed Central journal article supplement (PMC3796524; doi:10.1371/journal.pone.0076070), 2013-10-14
Supplement: pone.0076070.s004.pdf [file pone.0076070.s004.pdf]

**Table S2.** Overlap area and Euclidean distances, corresponding to Figure 6. CI for 95% bootstrap confidence intervals.

| Age (Ma) | Coexisting species 1         |    | Coexisting species 2        |    | Overlap area (%) | Distance |                   |                   | Note                                                                                                                       |
|----------|------------------------------|----|-----------------------------|----|------------------|----------|-------------------|-------------------|----------------------------------------------------------------------------------------------------------------------------|
|          | Name                         | N  | Name                        | N  |                  | Mean     | Lower limit of CI | Upper limit of CI |                                                                                                                            |
| 6.5      | <i>Karnimata huxleyi</i>     | 10 | <i>Parapelomys robertsi</i> | 5  | 13.2             | 0.041    | 0.026             | 0.055             |                                                                                                                            |
| 6.5      | <i>Mus auctor</i>            | 13 | <i>Karnimata huxleyi</i>    | 10 | 0.0              | 0.091    | 0.072             | 0.107             |                                                                                                                            |
| 6.5      | <i>Mus auctor</i>            | 13 | <i>Parapelomys robertsi</i> | 5  | 0.0              | 0.115    | 0.086             | 0.141             |                                                                                                                            |
| 7.4      | <i>Mus sp.</i>               | 9  | <i>Progonomys sp.</i>       | 8  | 10.0             | 0.037    | 0.022             | 0.049             |                                                                                                                            |
| 7.4      | <i>Mus sp.</i>               | 9  | <i>Karnimata sp.</i>        | 13 | 0.0              | 0.091    | 0.076             | 0.105             |                                                                                                                            |
| 7.4      | <i>Progonomys sp.</i>        | 8  | <i>Karnimata sp.</i>        | 13 | 0.0              | 0.060    | 0.042             | 0.070             |                                                                                                                            |
| 8.2      | <i>Progonomys sp.</i>        | 11 | <i>Karnimata sp.</i>        | 17 | 0.0              | 0.053    | 0.041             | 0.060             |                                                                                                                            |
| 8.8      | <i>Progonomys sp.</i>        | 14 | <i>Karnimata sp.</i>        | 5  | 4.3              | 0.049    | 0.040             | 0.067             |                                                                                                                            |
| 9.2      | <i>Progonomys debruijini</i> | 18 | <i>Karnimata darwini</i>    | 36 | 8.3              | 0.042    | 0.032             | 0.051             | <i>K. darwini</i> : 9.4, 9.2, 9.0 Ma,<br><i>P. debruijini</i> : 9.2, 9.0 Ma                                                |
| 10.1     | <i>Progonomys sp.</i>        | 15 | <i>Karnimata sp.</i>        | 9  | 12.3             | 0.040    | 0.025             | 0.054             | <i>Karnimata</i> : 10.1 Ma,<br><i>Progonomys</i> : 10.1 to 10.5 Ma                                                         |
| 10.5     | <i>Progonomys sp.</i>        | 15 | <i>Karnimata sp.</i>        | 11 | 19.7             | 0.031    | 0.018             | 0.040             | <i>Karnimata</i> : 10.5 and 10.2 Ma,<br><i>Progonomys</i> : 10.1 and 10.5 Ma                                               |
| 11.3     | <i>Progonomys hussaini</i>   | 35 | ? <i>Karnimata</i>          | 6  | 49.3             | 0.025    | 0.015             | 0.032             | <i>P. hussaini</i> : 11.6, 11.5, 11.4,<br>11.3, 11.2 Ma + <i>Progonomys sp.</i><br>(12.3 Ma), ? <i>Karnimata</i> : 11.2 Ma |
