# Supplementary material for: Lineage-Specific Responses of Tooth Shape in Murine Rodents (Murinae, Rodentia) to Late Miocene Dietary Change in the Siwaliks of Pakistan
Source: PubMed Central journal article supplement (PMC3796524; doi:10.1371/journal.pone.0076070), 2013-10-14
Supplement: pone.0076070.s005.pdf [file pone.0076070.s005.pdf]

**Table S3.** Euclidean distances from *Antemus chinjiensis* at 13.8 Ma to each species, corresponding to Figure 7.

| Age (Ma) | Species                      | N  | Mean  | Lower limit of CI | Upper limit of CI | Percentage (%) | Combined age                          |
|----------|------------------------------|----|-------|-------------------|-------------------|----------------|---------------------------------------|
| 6.5      | <i>Parapelomys robertsi</i>  | 5  | 0.113 | 0.095             | 0.134             | 100            |                                       |
| 6.5      | <i>Karnimata huxleyi</i>     | 10 | 0.088 | 0.071             | 0.098             | 78             |                                       |
| 6.5      | <i>Mus auctor</i>            | 13 | 0.081 | 0.067             | 0.093             | 71             |                                       |
| 7.2      | <i>Parapelomys</i> sp.       | 3  | 0.090 | 0.072             | 0.103             | 80             | 7.1, 7.2, 8.0 Ma                      |
| 7.4      | <i>Karnimata</i> sp.         | 13 | 0.080 | 0.067             | 0.088             | 71             |                                       |
| 7.4      | <i>Progonomys</i> sp.        | 8  | 0.075 | 0.064             | 0.084             | 66             |                                       |
| 7.4      | <i>Mus</i> sp.               | 9  | 0.087 | 0.073             | 0.099             | 77             |                                       |
| 8.2      | <i>Karnimata</i> sp.         | 17 | 0.078 | 0.066             | 0.086             | 69             |                                       |
| 8.2      | <i>Progonomys</i> sp.        | 11 | 0.058 | 0.047             | 0.066             | 51             |                                       |
| 8.8      | <i>Karnimata</i> sp.         | 5  | 0.090 | 0.079             | 0.107             | 79             |                                       |
| 8.8      | <i>Progonomys</i> sp.        | 14 | 0.059 | 0.049             | 0.068             | 52             |                                       |
| 9.2      | <i>Karnimata darwini</i>     | 36 | 0.064 | 0.056             | 0.071             | 57             | 9.4, 9.2, 9.0 Ma                      |
| 9.2      | <i>Progonomys debruijini</i> | 18 | 0.059 | 0.047             | 0.070             | 52             | 9.2, 9.0 Ma                           |
| 10.1     | <i>Karnimata</i> sp.         | 9  | 0.059 | 0.046             | 0.065             | 52             |                                       |
| 10.5     | <i>Karnimata</i> sp.         | 11 | 0.068 | 0.059             | 0.077             | 60             | 10.5, 10.2 Ma                         |
| 10.5     | <i>Progonomys</i> sp.        | 15 | 0.053 | 0.041             | 0.063             | 47             | 10.5, 10.1 Ma                         |
| 11.2     | ? <i>Karnimata</i>           | 6  | 0.046 | 0.032             | 0.059             | 41             |                                       |
| 11.4     | <i>Progonomys hussaini</i>   | 35 | 0.041 | 0.032             | 0.046             | 36             | 12.3, 11.6, 11.5, 11.4, 11.3, 11.2 Ma |
| 12.4     | near <i>Progonomys</i>       | 5  | 0.038 | 0.019             | 0.054             | 34             |                                       |
| 13.0     | <i>Antemus chinjiensis</i>   | 7  | 0.022 | 0.010             | 0.028             | 20             | 13.2, 13.1, 12.8 Ma                   |
| 13.6     | <i>Antemus chinjiensis</i>   | 14 | 0.011 | 0.005             | 0.011             | 10             | 13.7, 13.6 Ma                         |
